# Supplementary material
Source: PubMed Central journal article supplement (PMC9874076)
Supplement: mmc1.pdf [file mmc1.pdf]

## **Supplemental information**

### **Identification of novel antiviral drug**

### **candidates using an optimized SARS-CoV-2**

### **phenotypic screening platform**

**Denisa Bojkova, Philipp Reus, Leona Panosch, Marco Bechtel, Tamara Rothenburger, Joshua D. Kandler, Annika Pfeiffer, Julian U.G. Wagner, Mariana Shumliakivska, Stefanie Dimmeler, Ruth Olmer, Ulrich Martin, Florian W.R. Vondran, Tuna Toptan, Florian Rothweiler, Richard Zehner, Holger F. Rabenau, Karen L. Osman, Steven T. Pullan, Miles W. Carroll, Richard Stack, Sandra Ciesek, Mark N. Wass, Martin Michaelis, and Jindrich Cinatl Jr.**

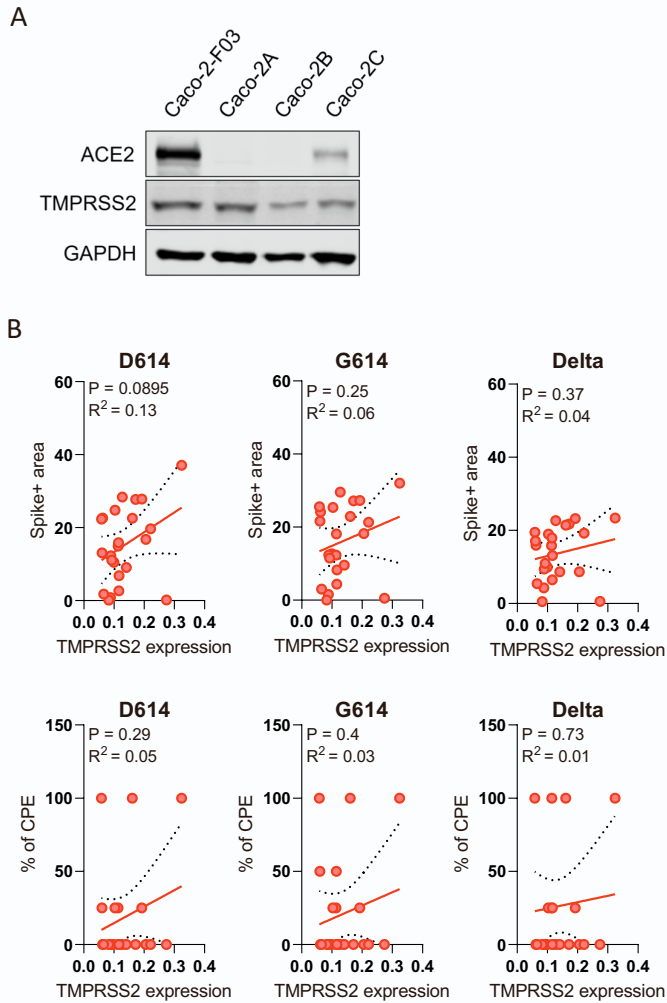

1  
2 **Figure S1. ACE2 and TMPRSS2 levels in Caco-2 cell lines of different origin and correlation of**  
3 **TMPRSS2 levels with SARS-CoV-2 susceptibility of clonal Caco-2A sublines, Related to Figure**  
4 **1. A) Western blots indicating ACE2 and TMPRSS2 levels in Caco-2 cell lines of different origin. B)**  
5 **Correlation of TMPRSS2 levels with SARS-CoV-2 susceptibility of clonal Caco-2A sublines as**  
6 **determined by immunostaining for the SARS-CoV-2 S protein and cytopathogenic effect (CPE)**  
7 **formation in SARS-CoV-2/FFM7 (G614) (MOI 1)-infected cells 48h post-infection.**  
8

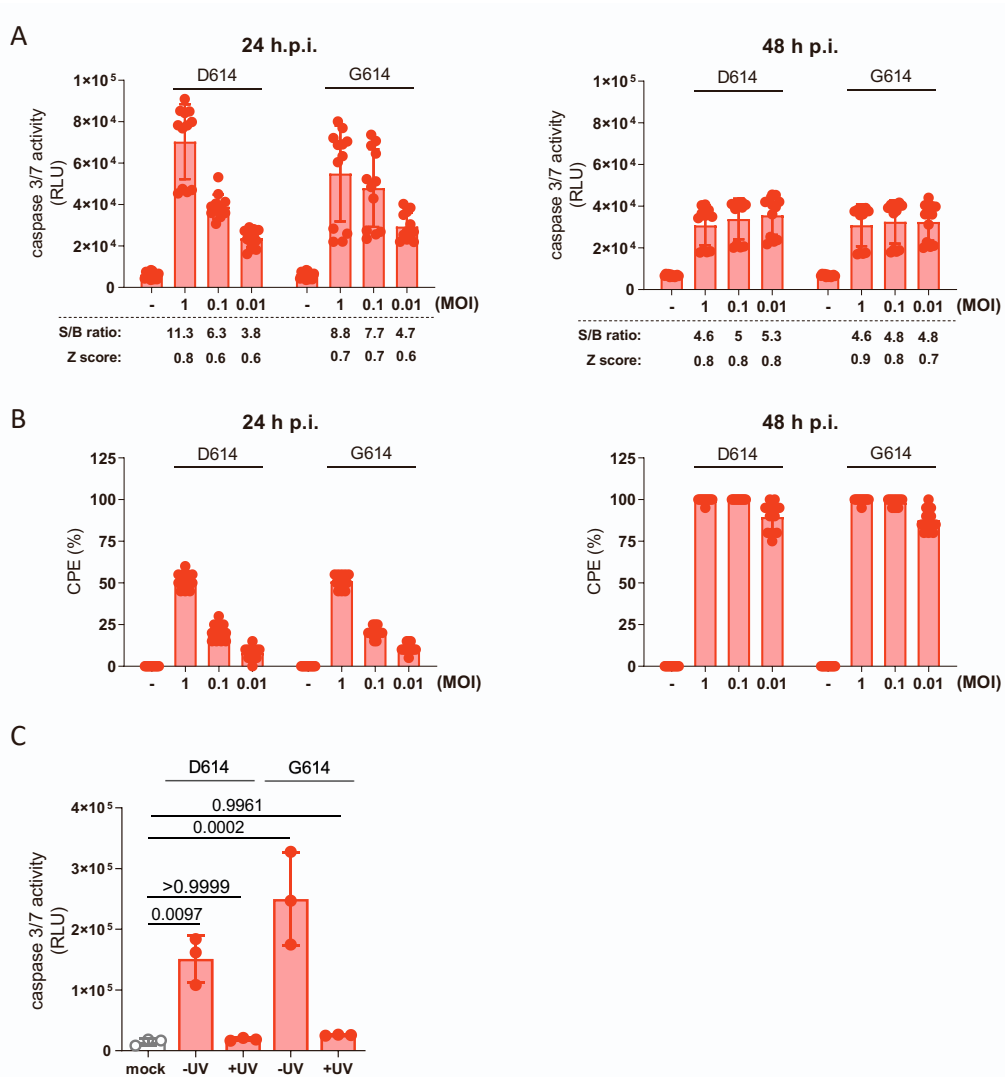

9  
10 **Figure S2. Caspase 3/7 activity as read-out indicating SARS-CoV-2 replication, Related to Figure**  
11 **2.** A) Caspase 3/7 activity in Caco-2-F03 cells infected with SARS-CoV-2 D614 and G614 isolates at  
12 MOI 1, 0.1, and 0.01 as determined by Caspase-Glo assay 24h or 48h post infection, including signal-  
13 to-basal (S/B) ratios and Z' scores. B) Cytopathogenic effect (CPE) formation in Caco-2-F03 cells  
14 infected with SARS-CoV-2 D614 and G614 isolates at MOI 1, 0.1, and 0.01 24h or 48h post infection.  
15 C) Caspase 3/7 activity in Caco-2-F03 cells infected with replication-competent and UV-inactivated  
16 SARS-CoV-2 D614 and G614 isolates (MOI 0.01) as determined by Caspase-Glo assay 48h post  
17 infection. P-values were calculated by one-way ANOVA.  
18

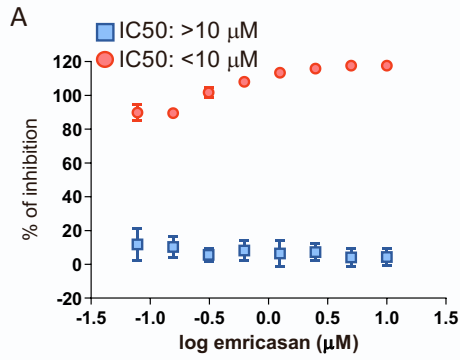

19  
 20 **Figure S3. Impact of the pan-caspase inhibitor emricasan on SARS-CoV-2 infection and SARS-**  
 21 **CoV-2-mediated caspase 3/7 activity in Caco-2-F03 cells, Related to Figure 2.** Emricasan-induced  
 22 inhibition of caspase 3/7 activity (red circles) and cellular S protein levels as indicated by immunostaining  
 23 (blue squares) in G614 (MOI 0.01)-infected Caco-2-F03 cells 48h post infection. Concentrations that  
 24 reduce caspase 3/7 activity and S staining by 50% (IC50) are also provided.  
 25

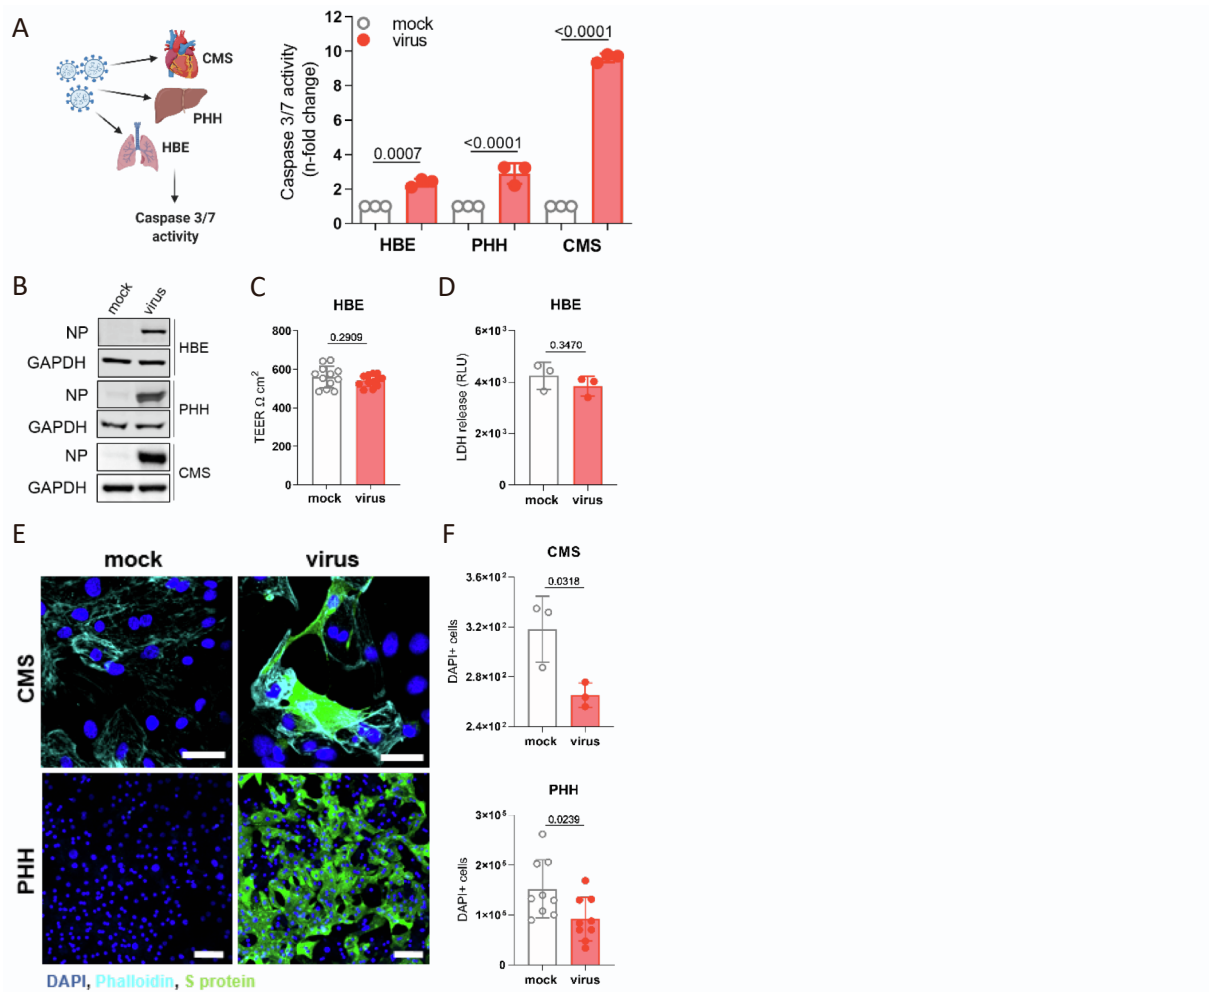

26  
 27 **Figure S4. Caspase 3/7 activity in SARS-CoV-2-infected primary human cell cultures, Related to**  
 28 **Figure 2.** A) Caspase 3/7 activity in G614 (MOI 1)-infected air liquid interface (ALI) cultures of bronchial  
 29 epithelial (HBE) cells, cardiomyocytes (CMS) and hepatocytes (PHH) as determined 120h (HBE) or 48h  
 30 (CMS, PHH) post infection. B) Western blots for the SARS-CoV-2 nucleoprotein (NP) confirming  
 31 infection in SARS-CoV-2 G614 (MOI 1)-infected primary human cell cultures. C) Transepithelial  
 32 electrical resistance (TEER) in G614-infected ALI HBE cultures. D) LDH release in G614-infected ALI  
 33 HBE. C) and D) indicate that SARS-CoV-2 infection does not result in a CPE in ALI HBE cultures. E)  
 34 CPE formation in G614-infected CMS and PHH. Immunofluorescence staining indicates SARS-CoV-2-  
 35 infected cells by S protein levels and cells by DAPI and phalloidin staining. F) Quantification of DAPI-  
 36 stained nuclei in G614-infected CMS and PHH. All p values were calculated by unpaired t-test.  
 37

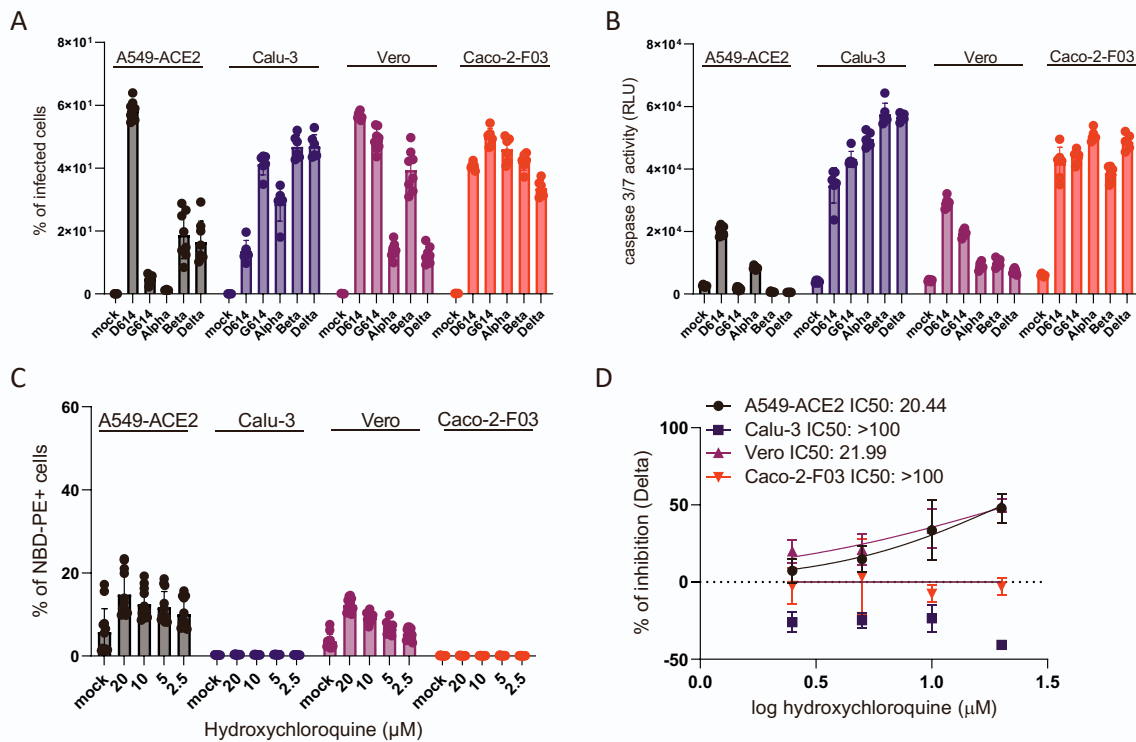

38  
39  
40  
41  
42  
43  
44  
45

**Figure S5. Susceptibility to different SARS-CoV-2 variants and drug-induced phospholipidosis in different cell lines used for SARS-CoV-2 cultivation, Related to Figure 2.** A) Spike (S) protein levels as determined by immunostaining and B) caspase 3/7 activity in cell lines infected with different SARS-CoV-2 isolates at MOI 0.01 at 48h post infection. C) Hydroxychloroquine-induced phospholipidosis as indicated by nitrobenzoxadiazole-conjugated phosphoethanolamine (NBD-PE) staining. D) Effects of hydroxychloroquine on cellular S levels in SARS-CoV-2 Delta (MOI 0.01)-infected cells 48h post infection.

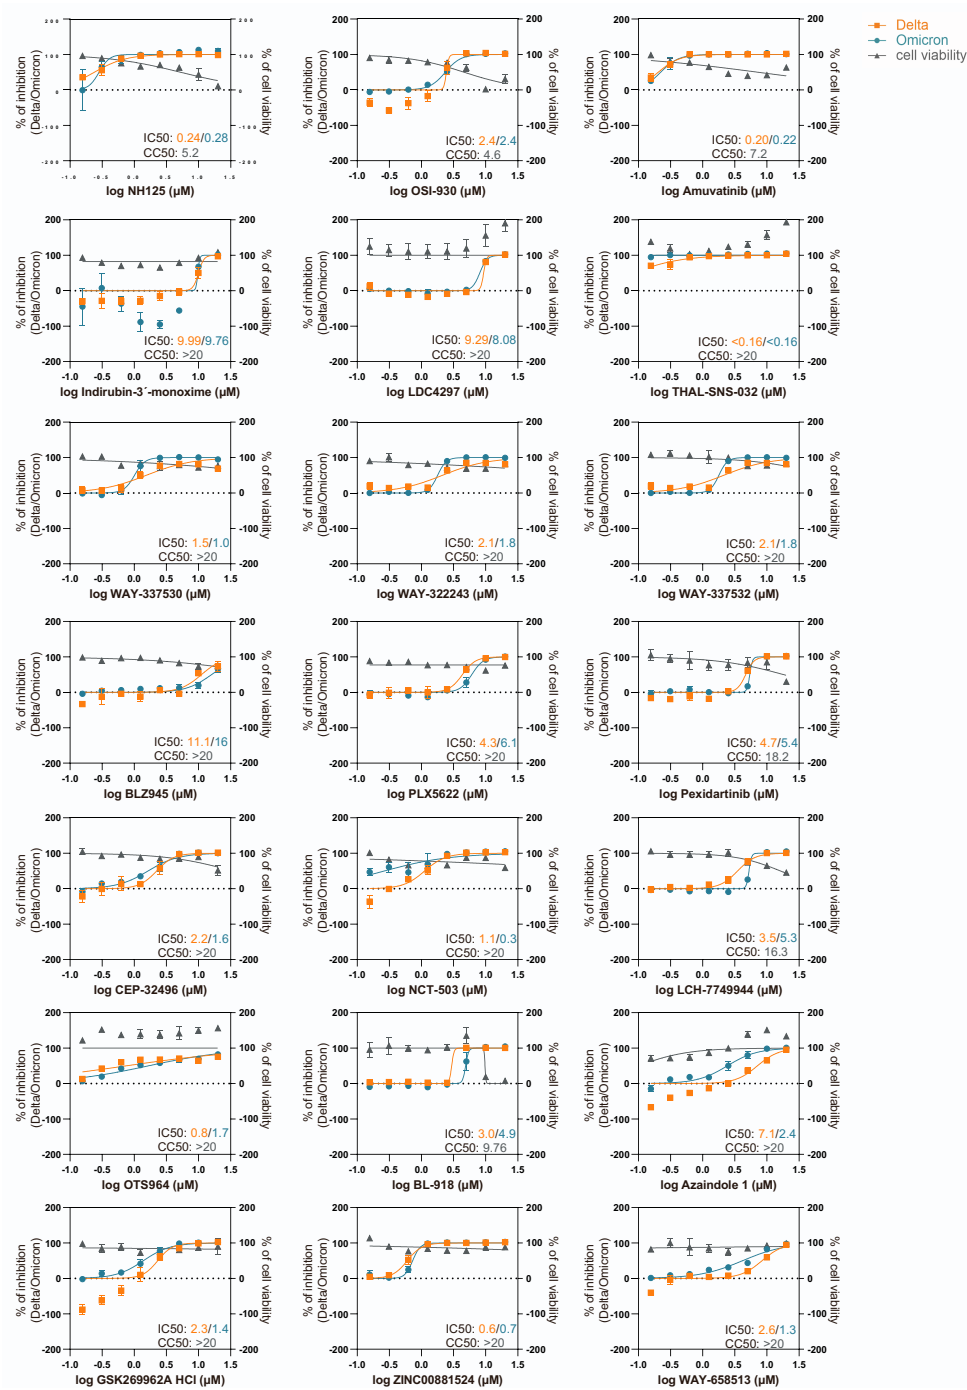

46  
47  
48  
49  
50

**Figure S6. Dose-response curves confirming the anti-SARS-CoV-2 activity of 21 hits by the determination of drug-response curves in SARS-CoV-2 strain FFM3 (MOI 0.01)-infected Caco-2-F03 cells using immunostaining for the viral S protein as read-out 48h post infection, Related to Figure 5. Cell viability was determined by CellTiterGlo assay.**

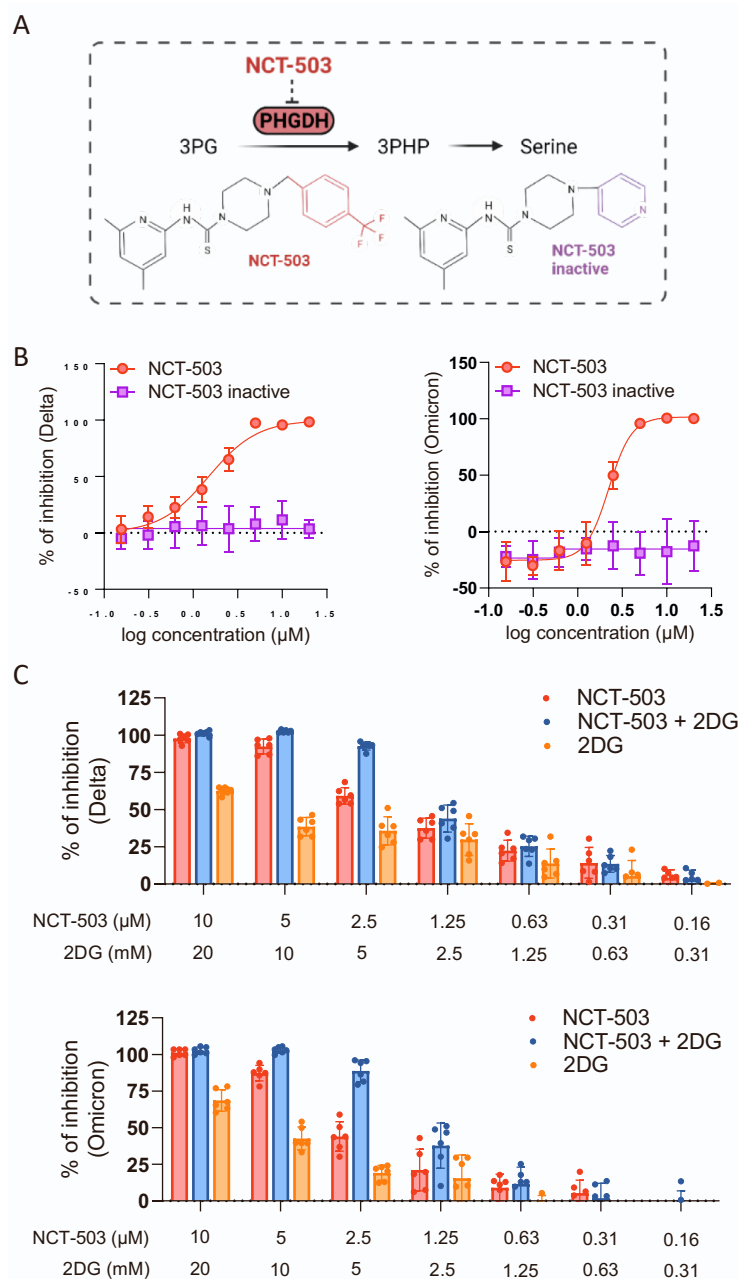

51  
 52 **Figure S7. Investigation of the anti-SARS-CoV-2 effects of the PHGDH inhibitor NCT-503, Related**  
 53 **to Figure 6.** A) Chemical structure of NCT-503 and a chemically closely related control that does not  
 54 inhibit PHGDH. B) Dose-response curves indicating the anti-SARS-CoV-2 activity of NCT-503 and the  
 55 inactive control in Caco-2-F03 cells infected with a Delta and an Omicron isolate (MOI 0.01) as  
 56 determined by immunostaining for S 48h post infection. C) Combined antiviral effects of NCT503 and  
 57 2DG in Delta and Omicron (MOI 0.01)-infected Caco-2-F03 cells as determined by S immunostaining  
 58 48h post infection.  
 59



60  
61  
62

**Table S1. Short tandem repeat profiles of Caco-2 cell lines from different sources, Related to Figure 1.**

|                    | TH 01 | D5<br>S818 | D13<br>S317  | D7<br>S820 | D16<br>S539 | CSF1<br>PO | Amel | VWA    | TPOX  |
|--------------------|-------|------------|--------------|------------|-------------|------------|------|--------|-------|
| Reference profile  | 6; 6  | 12; 13     | 11,13;<br>14 | 11; 12     | 12; 13      | 11; 11     | X; X | 16; 18 | 9; 11 |
| Caco-2-F03         | 6; 6  | 12; 13     | 11,13;<br>14 | 11; 12     | 12; 13      | 11; 11     | X; X | 16; 18 | 9; 11 |
| Caco-2A            | 6; 6  | 12; (3     | 11,13;<br>14 | 11; 12     | 12; 13      | 11; 11     | X; X | 16; 18 | 9; 11 |
| Caco-2B            | 6; 6  | 12; 13     | 11,13;<br>14 | 11; 12     | 12; 13      | 11; 11     | X; X | 16; 18 | 9; 11 |
| Caco-2C            | 6; 6  | 12; 13     | 11,13;<br>14 | 11; 12     | 12; 13      | 11; 11     | X; X | 16; 18 | 9; 11 |
| Caco-2 clone I     | 6; 6  | 12; 13     | 11,13;<br>14 | 11; 12     | 12; 13      | 11; 11     | X; X | 16; 18 | 9; 11 |
| Caco-2 clone II    | 6; 6  | 12; 13     | 11,13;<br>14 | 11; 12     | 12; 13      | 11; 11     | X; X | 16; 18 | 9; 11 |
| Caco-2 clone III   | 6; 6  | 12; 13     | 13; 14       | 11; 12     | 12; 13      | 11; 11     | X; X | 16; 18 | 9; 11 |
| Caco-2 clone IV    | 6; 6  | 12; 13     | 13; 14       | 11; 12     | 12; 13      | 11; 11     | X; X | 16; 18 | 9; 11 |
| Caco-2 clone VI    | 6; 6  | 12; 13     | 11,13;<br>14 | 11; 12     | 12; 13      | 11; 11     | X; X | 16; 18 | 9; 11 |
| Caco-2 clone VII   | 6; 6  | 12; 13     | 11; 14       | 11; 12     | 12; 13      | 11; 11     | X; X | 16; 18 | 9; 11 |
| Caco-2 clone IX    | 6; 6  | 12; 13     | 11,13;<br>14 | 11; 12     | 12; 13      | 11; 11     | X; X | 16; 18 | 9; 11 |
| Caco-2 clone XI    | 6; 6  | 12; 13     | 13; 14       | 11; 12     | 12; 13      | 11; 11     | X; X | 16; 18 | 9; 11 |
| Caco-2 clone XII   | 6; 6  | 12; 13     | 13; 14       | 11; 12     | 12; 13      | 11; 11     | X; X | 16; 18 | 9; 11 |
| Caco-2 clone XIII  | 6; 6  | 12; 13     | 14; 14       | 11; 12     | 12; 13      | 11; 11     | X; X | 16; 18 | 9; 11 |
| Caco-2 clone XIV   | 6; 6  | 12; 13     | 11,13;<br>14 | 11; 12     | 12; 13      | 11; 11     | X; X | 16; 18 | 9; 11 |
| Caco-2 clone XV    | 6; 6  | 12; 13     | 11; 14       | 11; 12     | 12; 13      | 11; 11     | X; X | 16; 18 | 9; 11 |
| Caco-2 clone XVI   | 6; 6  | 12; 13     | 13; 14       | 11; 12     | 12; 13      | 11; 11     | X; X | 16; 18 | 9; 11 |
| Caco-2 clone XVII  | 6; 6  | 12; 13     | 11; 14       | 11; 12     | 12; 13      | 11; 11     | X; X | 16; 18 | 9; 11 |
| Caco-2 clone XVIII | 6; 6  | 12; 13     | 11; 14       | 11; 12     | 12; 13      | 11; 11     | X; X | 16; 18 | 9; 11 |

|                    |      |        |              |        |        |        |      |        |       |
|--------------------|------|--------|--------------|--------|--------|--------|------|--------|-------|
| Caco-2 clone XX    | 6; 6 | 12; 13 | 13; 14       | 11; 12 | 12; 13 | 11; 11 | X; X | 16; 18 | 9; 11 |
| Caco-2 clone XXI   | 6; 6 | 12; 13 | 13; 14       | 11; 12 | 12; 13 | 11; 11 | X; X | 16; 18 | 9; 11 |
| Caco-2 clone XXII  | 6; 6 | 12; 13 | 11,13;<br>14 | 11; 12 | 12; 13 | 11; 11 | X; X | 16; 18 | 9; 11 |
| Caco-2 clone XXIII | 6; 6 | 12; 13 | 11; 14       | 11; 12 | 12; 13 | 11; 11 | X; X | 16; 18 | 9; 11 |

63  
64  
65
